# Supplementary material for: Overexpression of a Brix Domain-Containing Ribosome Biogenesis Factor ARPF2 and its Interactor ARRS1 Causes Morphological Changes and Lifespan Extension in Arabidopsis thaliana
Source: PubMed Central journal article supplement (PMC6120060; doi:10.3389/fpls.2018.01177), 2018-08-27
Supplement: Presentation_1.pdf [file Presentation_1.pdf]

|        |                                                                                                            |     |
|--------|------------------------------------------------------------------------------------------------------------|-----|
| IMP4   | LLTTSRNPSAPLIRFTKELKFVFP—NSQR—INRGSQVISEI IETARSHDFTDVIIVHEHRGVPDGLI I SHLPFGPTAYFGLLNVVTRHDI SDK          | 91  |
| RPF1   | LLTTCRFNSTRGPALISELLSVIP—NSHY—QKRGTYDLKKIVEYATKDFTS LI VVHTNRREPDALL I IGLPNGPTAHFKLSNLVLRKDIKN—           | 90  |
| BRX1-1 | LVTCSRRI NFRYRHLMLNMVSLLP—HCKKDSKVEAKSSRGATLNEL I ELKGSSSCLFFECRKHKDLYMMWVKSPGGPSVKFLVNAVHTMEELKLT         | 94  |
| BRX1-2 | LVTCSRRI SFYRSLMLNIVSLLP—HCKKDSKVEAKSSKGATLNEL I ELKNSNSCLFFECRKHKDLYMMWVKSPNGPSVKFLVKAVHAMEEMKLT          | 94  |
| SNAIL1 | FVFSRMKLAGPVKQLQMDLRKLM—PYTALS LKEKKRNTLRDFLNVSGPMGVTHFLMLS KTAS—SLSLRVARTPQGPTLTFK I HQYSLASDIAQS         | 93  |
| ARPF2  | LILHGTKTSATLSSVMTELYRLKGGGAI RYSRRNENIRPFESGGETSLEFFSQKTDGSI FVYGSHTKKRPDNLVLGRMYDHQVYDL I EVG I ENFKSLRAF | 100 |
|        |                                                                                                            |     |
| IMP4   | KSIGKMPE—QYPHLIFN—NFTTQMQRVGNILKHIFP—APKLDAGR—IVTFSNQSD—YISFRNHVY—                                         | 152 |
| RPF1   | —HGNPTS—HQPELVLN—NFTTRLGNRVGRFFQSLFPPDPNFRGRR—VVTFHNRD—FIFFRHHRYIFETKESK—                                  | 158 |
| BRX1-1 | GNHLKGSR—PLLTSSN—FENDAHWKLKEMLTQIFGIPEGHRKSKPYHDHVFVFSIVDD—HIWFRNYQISVPHNES—                               | 168 |
| BRX1-2 | GNHLKGSR—PLLTSSN—FDKAHWKLKEMLTQVFGIPKEHRKSKPYHDHVFVFSIVDE—HIWFRNYQISVPHNES—                                | 168 |
| SNAIL1 | QLRPRCPQDLFKSPPLIVLSGF—GSQELHLKLATIMFQNI FPAIDINTVKLSTCQRLVLLNYNKDTKLIDFRHYSIRLQPVGVSRRI RKFVQNHQVPDLR     | 192 |
| ARPF2  | SYDKKFAPHEG—TKPFI CF I GEGFENVSELKHLKEVLTDLFRGEVVDNLNLTGLDRAYVCSAISP—TKVFLTHCALK—                          | 177 |
|        |                                                                                                            |     |
| IMP4   | —DKGEGGPK—SIELKEIGPRFELRLYQV                                                                               | 178 |
| RPF1   | —SDKGKEETI—KPRLQECGPRFTLKLVTL                                                                              | 185 |
| BRX1-1 | —DKIARGDLD—KMTLIEVGPRFCLNPIKI                                                                              | 195 |
| BRX1-2 | —DKIAGGLD—KMTLIEVGPRFCLNPIKI                                                                               | 195 |
| SNAIL1 | NLQDVSDVFTKAGYGSESEGDDEEAATVTLSSDLGRVNGGATKSAVKLQEI GPRMTMQLVKV                                            | 253 |
| ARPF2  | —KSGSIVPRMELVEVGPSMDLVI RRN                                                                                | 202 |

**Figure S1** Alignment of amino acid sequences of Brix domains from *Arabidopsis thaliana*. The sequence alignment was produced with the ClustalW program (<http://www.genome.jp/tools/clustalw/>). Amino acid residues conserved in all amino acid sequences are shaded in gray.

```

ARPF2 MMEIRTPKTKGAKRVLESRAPKLVETGKKTLLHGTKTSATLSSVMTELYRLKKGGAIRY 60
Rpf2 MIRTVKPKNARAKRALVKREAKLVENVKQALFIPGQSCNKLHDIMVDLSALKKPKDMKRF 60
ARPF2 SRRNENIRPFESGGETSLEFFSQKTDCSIFVYGSHTKKRPDNLVLGRMYDHQVYDLIEVG 120
Rpf2 NRKND-IHPFED--MSPLEFFSEKNDCSLMVLMTSSKKRKNMFIIRTFGYKIYDMIELM 117
ARPF2 IENFKSLRAFSYDKKFAPHEGTPKPFICFIGEGFENVSELKHLKEVLTDLFRGEVVDNLNL 180
Rpf2 VADN--FKLLSDFKKLTFVGLKPMFTFQGAADFTHPVYKQIKSLFLDFFRGESTDLQDV 175
ARPF2 TGLDRAYVCSAISPT-----KVFLTHCALKLKKS---GSI VPRMELVEVGPSMDLVIIR 230
Rpf2 AGLQHVISMTIQGDFQDGEPLPNVLFVYKLSYKSDQGGKRLPRIELVEIGPRLDFKIG 235
ARPF2 RNRLPNDSLMKEAMRTSKDKPKKKEKNVDQDAVLGKTGKIYMPDQ-----KLKEMKLFDK 285
Rpf2 RIHTPSPDMVTEAHKKPKQLEMKTKKNVELDIMGDKLGRIMGKQDLGKLQTRKMKGLKS 295
ARPF2 SKGSKRERKDAKLKHKEETVAKMKVSS----- 314
Rpf2 KFDQGTEEGDGEVDEDYEDEASYSDDGQEEYEEEFVSATDIEPSAKRQKK 344

```

**Figure S2** Alignment of amino acid sequences of ARPF2 and Rpf2. The sequence alignment of ARPF2 (At3g23620.1) and *Saccharomyces cerevisiae* Rpf2 (NP\_013007.1) was produced with the ClustalW program (<http://www.genome.jp/tools/clustalw/>). Similar and identical amino acid residues in the two amino acid sequences are shaded in light and dark gray, respectively. The sequences of the Brix domain are indicated by red line.

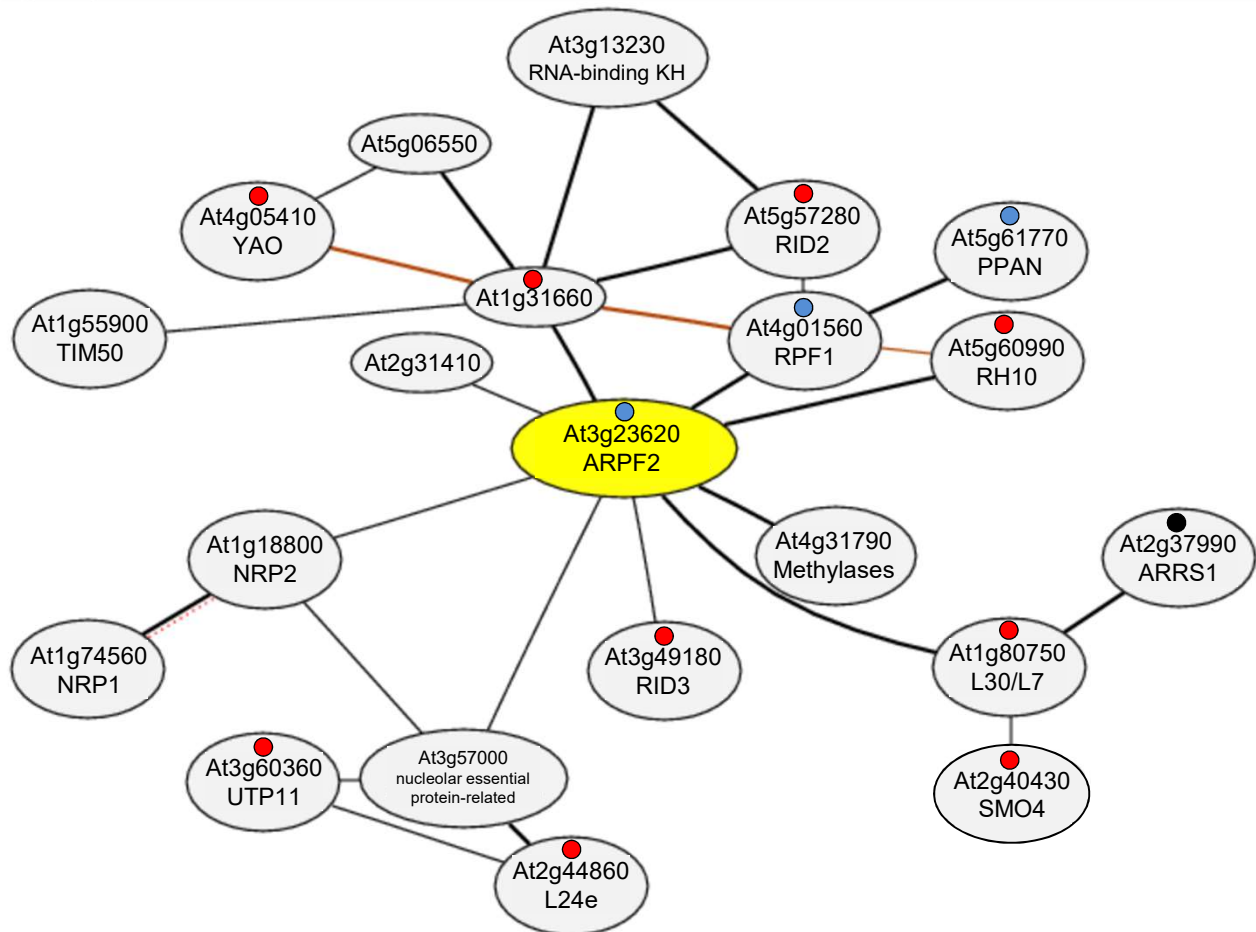

**Figure S3** Co-expression network including *ARPF2*. A co-expression network of *ARPF2* was obtained using the ATTEDII program (<http://atted.jp/>) with the parameter “Coexpression data; All”. Genes reported as “ribosome-related gene” are indicated by red dots; *At1g31660*, Missbach et al. (2013); *RID2* (*At5g57280*) and *RID3* (*At3g49180*), Shinohara et al. (2014); *YAO* (*At4g05410*), Li et al. (2010); *L24e* (*At2g44860*) and *L30/L7* (*At1g80750*), Carroll et al. (2008); *RH10* (*At5g60990*), Matsumura et al. (2016); *SMO4* (*At2g40430*), Zhang et al. (2015). Genes encoding Brix domain-containing proteins are indicated by blue dots. *ARRS1* is indicated by black dot.

```

ARRS1 -----MDTEMETEQIYQVDVGNLLAFNP-----NHRFPSAPSSRGELVKEILTEGTKL 48
Rrs1  MSAEDYKNLPVTVEKPIPVVYDLGNLAAFDSNVLDKNDLDSSNARREEKIKSLTRDNVQL 60

ARRS1  VQEIANLKFNFSTETNDGP-----IVQLPPPTTKLPREKHIPRPKPPTKWEFALK 100
Rrs1  LINQLLSLPMKTTTESVGGTGGQSSVMTLLQLPDPTDLPREKPLPKAKAMTKWEKFAAK 120

ARRS1  KGIQKRKKE-KVVWDEQTNQFKRRHGYDRVNDNDVPIIEAKESDEPG-----VDPFAKR 154
Rrs1  KGIKPKERAGKMIYDEASGEWVPKWGYKGANKKLDQWLVEVDDKVKGTDNELIDPRTLN 180

ARRS1  LDDKKKRVGKQEKRLQNLKAAEKAGALPSHVQLAATSLPISGTKAQPCKIGKDELGDVA 214
Rrs1  RAERKRLVKKNEKQRRNMKNAL----- 203

ARRS1  GLAATSTASGGKFDKLPGEKPPKKQGHKHYLPVVSGRGDVNAEKEQTNNVLSKIFSKH 274
Rrs1  -----

ARRS1  SHEILNVGKAINMYNVKKEKKKSGRSDKLPKPKDITKPKANKAK 318
Rrs1  -----

```

**Figure S4** Alignment of amino acid sequences of ARRS1 and Rrs1. Sequence alignment of ARRS1 (At2g37990.1) and *Saccharomyces cerevisiae* Rrs1 (NP\_014937.1) was produced with the ClustalW program (<http://www.genome.jp/tools/clustalw/>). Similar and identical amino acid residues in the two amino acid sequences are shaded in light and dark gray, respectively.

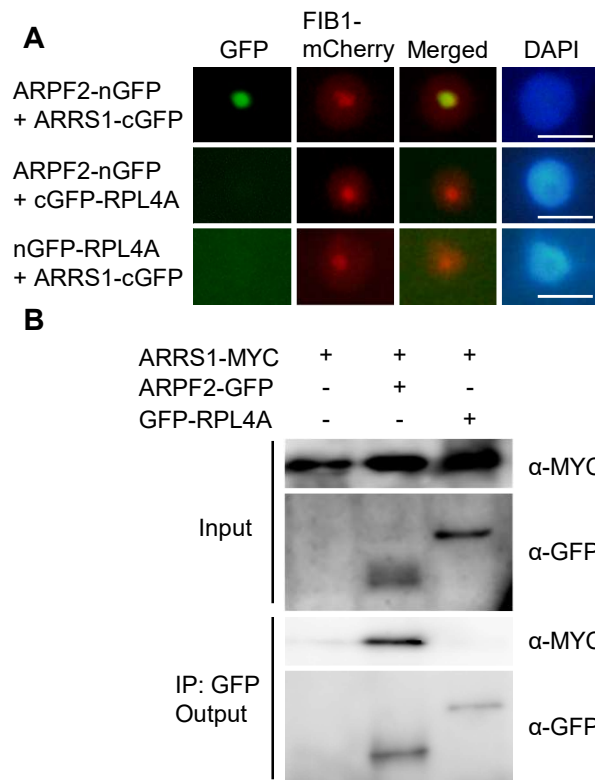

**Figure S5** Specificity of the ARPF2- ARRS1 interaction. (A) BiFC assays. ARPF2 fused to nGFP (ARPF2-nGFP) was co-expressed with cGFP-fused ARRS1 (ARRS1-cGFP) or RPL4A (cGFP-RPL4A) and FIB1-mCherry in *N. benthamiana* leaves. ARRS1-cGFP was also co-expressed with GFP-fused RPL4A (nGFP-RPL4A) and FIB1-mCherry. Scale bars: 10  $\mu$ m. (B) Co-immunoprecipitation assays. ARRS1-MYC was transiently expressed alone or with ARPF2-GFP or GFP-RPL4A in *N. benthamiana* leaves. The ARPF2-GFP or GFP-RPL4A proteins in the crude cell extracts (Input) were immunoprecipitated with an anti-GFP antibody, and the obtained precipitates (Output) were analyzed with anti-GFP and anti-MYC antibodies.

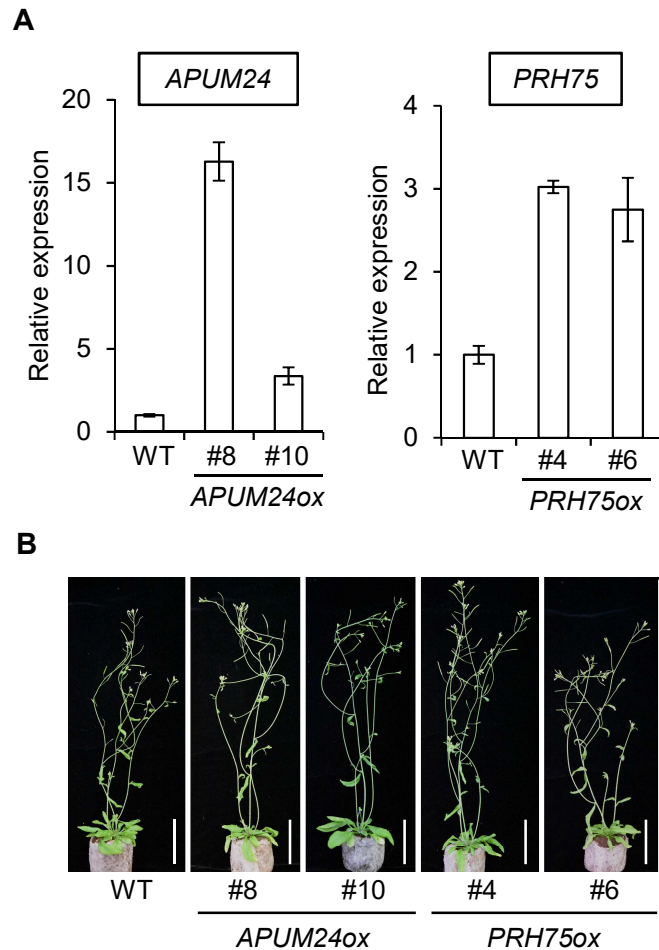

**Figure S6** Phenotypic analysis of transgenic *Arabidopsis* overexpressing *APUM24* or *PRH75*. **(A)** Levels of *APUM24* and *PRH75* transcripts in the wild type and *APUM24* or *PRH75* overexpressing plants. RNA was extracted from 10-day-old seedlings and technical triplicates were used for quantification. *UBQ10* was used as an internal control. The expression levels are relative to that in the wild type, and the values obtained with the wild type were set to 1. Error bars represent SD. **(B)** Photographs of the plants grown for 5 weeks. Scale bars: 5 cm.

**Supplemental Table S1. List of the Primer Sequences.**

| Primer name                     | Sequence (5'-3')                        |
|---------------------------------|-----------------------------------------|
| <b>Vector construction</b>      |                                         |
| pRPF2 5'entry                   | CACCACCTATAGAGACGACAATGTC               |
| pRPF2 3'entry                   | GACTCTGTTAAATCGCCGAAAG                  |
| RPF2 5'entry                    | CACCATGATGGAATACGAACTCC                 |
| RPF2 3'entry                    | CTCAGAAGAGACCTTCATCTTTTTG               |
| RRS1 5'entry                    | CACCATGGACACGGAGATGG                    |
| RRS1 3'entry                    | CTTGGCTTTGTTGGCAGGCTTC                  |
| APUM24 5'entry                  | CACCATGTCTTCCAAAGG                      |
| APUM24 3'entry                  | TTCAGTTTCTTGTTGCTGAGATC                 |
| PRH75 5'entry                   | CACCATGCCTTCCCTAATGTTATCTG              |
| PRH75 3'entry                   | TCAATATCTCTGGCCTCTACCACCAC              |
| RPL4A 5'entry                   | CACCATGGCCGCCGCCGCT                     |
| RPL4A 3'entry                   | TTACTGGCTAGCACCCGAGCCATTTG              |
| <b>Genotype check</b>           |                                         |
| Primer "A"                      | TGGTTCACGTAGTGGGCCATCG                  |
| Primer "B"                      | TTCATAACCAATCTCGATACAC                  |
| Primer "F"                      | GTCACTATAGTTGTTGCTTACCTCATG             |
| Primer "R"                      | GTCGTTTCTTCGTGTGAGAACC                  |
| <b>RT-qPCR</b>                  |                                         |
| RPF2 F                          | CATCCAAGGATAAGCCTAAGAAGAAG              |
| RPF2 R                          | CTCAGAAGACACCTTCATCTTTTTG               |
| RRS1 F                          | TGGGGATGTTAACGCAGAAAAAGAAC              |
| RRS1 R                          | CTTGGCTTTGTTGGCAGGCTTC                  |
| APUM24 F                        | CTTGTCACACAGTGGCCTTG                    |
| APUM24 R                        | TCACACAGCTTCTCGCTCAG                    |
| PRH75 F                         | GAGGATTCTACTAAAGTCCAGAC                 |
| PRH75 R                         | ATAATATCAGGAATCAACCGAGCC                |
| UBQ10 F                         | GATCTTTGCCGAAAAACAATTGGAGGATGGT         |
| UBQ10 R                         | CGACTTGTCCATTAGAAAAGAAAGATAACAGG        |
| Forward primer of "1" in Fig. 5 | TTCGGCGTATGAGTGGTG                      |
| Reverse primer of "1" in Fig. 5 | CATTCATCGATCACGGCAATTCC                 |
| Forward primer of "2" in Fig. 5 | AACGACCCGCGAACCAAAGATCAC                |
| Reverse primer of "2" in Fig. 5 | ACACTTTTCGTGCCGGGTTTTGTG                |
| Forward primer of "3" in Fig. 5 | CGACTCTCGGCAACGGATAT                    |
| Reverse primer of "3" in Fig. 5 | TTGTGACACCCAGGCAGACG                    |
| Forward primer of "4" in Fig. 5 | ATCGTCGTCCCTCACCATCCTTTGCTGATG          |
| Reverse primer of "4" in Fig. 5 | GCATGTCCGTACGCTCCA                      |
| Forward primer of "5" in Fig. 5 | TGATCCATTACATTTTATCGGTCCG               |
| Reverse primer of "5" in Fig. 5 | CTTAAACTCAGCGGGTAATCC                   |
| Forward primer of "6" in Fig. 5 | CACGTCTGCCTGGGTGTCAC                    |
| Reverse primer of "6" in Fig. 5 | Same as reverse primer of "5" in Fig. 5 |
| Forward primer of "7" in Fig. 5 | AATCCGGGCTAGAAGCGACG                    |
| Reverse primer of "7" in Fig. 5 | AATTCAAGGCGGTCCGAACGAC                  |
| Forward primer of "8" in Fig. 5 | GCCCTTTGTCGCTAAGATTCCA                  |
| Reverse primer of "8" in Fig. 5 | GTTTTGGACAAGTCTGTCTCTTCAC               |
| Forward primer of "9" in Fig. 5 | GATGCGATCATACCAGCACTAATGC               |
| Reverse primer of "9" in Fig. 5 | AGGGATGCAACACGAGGACTTC                  |
